# Supplementary material for: Identification and functional characterization of silicon transporters in soybean using comparative genomics of major intrinsic proteins in Arabidopsis and rice
Source: Springer Nature journal article supplement (doi:10.1007/s11103-013-0087-3), 2013-06-14
Supplement: MOESM1 [file 11103_2013_87_MOESM1_ESM.docx]

**Table S1** Details of experimental evidence provided in the reports demonstrating the beneficial effect of silicon amendment for the soybean cultivation

| **Sr. No.** | **Observed effect of silicon in soybean cultivation** | **reference** |
| --- | --- | --- |
|  | **Insect resistance** |  |
| 1 | Resistance induced on against *Bemisiatabaci* | Ferreira *et al.,* 2011 |
|  | **Disease resistance** |  |
| 1 | Resistance to soybean rust | Lemes *et al.,* 2011 |
| 2 | Resistance to soybean rust | Arsenault-Labrecque *et al.,* 2012 |
| 3 | Resistance to soybean rust | Rodrigues *et al.,* 2009 |
| 4 | Resistance to soybean rust | Visser *et al.,* 2011 |
|  | **Abiotic stress tolerance** |  |
| 1 | Salinity tolerance | Hamayun *et al.,* 2010 |
| 2 | Salinity tolerance | Lee *et al.,* 2010 |
| 3 | Elevate aluminium toxicity | Baylis 1994 |
| 4 | Drought tolerance | Hamayun *et al.,* 2010 |
| 5 | Ultraviolet-B tolerance | Shen *et al.,* 2010 |
| 6 | Decrease the Mn concentration in leaf | Kluthcouski and Nelson 1980 |
|  | **Agronomical performance** |  |
| 1 | Enhanced vegetative development | Ferreira *et al.,* 2011 |
| 2 | Enhanced soybean seedlings grown in potassium-deficient medium | Miao *et al.,* 2010 |
| 3 | Growth promoting in nutrient solution | Miyake and Takahashi 1985 |
| 4 | Enhanced seed germination and seedlings growth rate | Li *et al.,* 2004 |

**References:**

Arsenault-Labrecque G, Menzies JG, Bélanger RR. 2012.Effect of Silicon Absorption on Soybean Resistance to *Phakopsora pachyrhizi* in Different Cultivars. *Plant Disease* **96**: 37-42.

Baylis AD, Gragopoulou C, Davidson KJ, Birchall JD. 1994. Effects of silicon on the toxicity of aluminium to soybean. *Communications in Soil Science & Plant Analysis* **25:** 537-546.

Ferreira RS, Moraes JC. 2011. Silicon influence on resistance induction against Bemisiatabaci biotype B (Genn.)(Hemiptera: Aleyrodidae) and on vegetative development in two soybean cultivars. *Neotropical Entomology* **40:** 495-500.

Hamayun, M, Sohn, EY, Khan SA, Shinwari ZK, Khan AL, Lee IJ. 2010. Silicon alleviates the adverse effects of salinity and drought stress on growth and endogenous plant growth hormones of soybean (*Glycine Max* L.). *Pakisthan Journal of Botany* **42:** 1713-1722.

Kluthcouski J, Nelson LE. 1980. The effect of silicon on the manganese nutrition of soybeans (Glycine max (L.) Merrill). *Plant and Soil*, **56:** 157-160.

Lee SK, Sohn EY, Hamayun M, Yoon JY, Lee IJ. 2010. Effect of silicon on growth and salinity stress of soybean plant grown under hydroponic system. *Agroforestry systems* **80:** 333-340.

Lemes EM, Mackowiak CL, Blount A, Marois JJ, Wright DL, Coelho L, Datnoff LE. 2011. Effects of silicon applications on soybean rust development under greenhouse and field conditions. *Plant Disease* **95:** 317-324.

Li Q, Ma C, Li H, Xiao Y, Liu X. 2004. Effects of soil available silicon on growth, development and physiological functions of soybean. *Chinese Journal of Applied Ecology* **1**: 015.

Miao BH, Han XG, Zhang WH. 2010.The ameliorative effect of silicon on soybean seedlings grown in potassium-deficient medium. *Annals of Botany* **105:** 967-973.

Miyake Y, Takahashi E. 1985. Effect of silicon on the growth of soybean plants in a solution culture. *Soil science and plant nutrition* **31:** 625-636.

Rodrigues FA, Duarte HS, Domiciano GP, Souza CA, Korndörfer GH, Zambolim L. 2009. Foliar application of potassium silicate reduces the intensity of soybean rust. *Australasian Plant Pathology* **38:** 366-372.

Shen X, Zhou Y, Duan L, Li Z, Eneji AE, Li J. 2010. Silicon effects on photosynthesis and antioxidant parameters of soybean seedlings under drought and ultraviolet-B radiation. *Journal of plant physiology* **167**: 1248-1252.

Visser D, Caldwell P, Laing M. 2011. The effect of potassium silicate on the control of Phakopsorapachyrhizi on soybean. *Proceedings of The 5th International Conference on Silicon in Agriculture* pp198.

**Table S2** Details of 70 major intrinsic proteins (MIPs) used as query in BLAST search performed to identify MIPs in soybean genome

| **Sr. No.** | **Gene ID** | **NCBI Acc. No.** | **Protein length** |
| --- | --- | --- | --- |
| 1. | AtNIP1-1 | AEE84127.1 | 296 |
| 2. | AtNIP1-2 | AEE84106.1 | 294 |
| 3. | AtNIP2-1 | CAC81707.2 | 288 |
| 4. | AtNIP3-1 | AEE31413.1 | 323 |
| 5. | AtNIP4-2 | AED94236.1 | 283 |
| 6. | AtNIP5-1 | AEE82874.1 | 304 |
| 7. | AtNIP6-1 | AEE36445.1 | 305 |
| 8. | AtNIP7-1 | AEE74343.1 | 275 |
| 9. | AtPIP1-1 | AEE80201.1 | 286 |
| 10. | AtPIP1-2 | NP001078066.1 | 274 |
| 11. | AtPIP1-3 | AEE27312.1 | 286 |
| 12. | AtPIP1-4 | Q39196.1 | 287 |
| 13. | AtPIP1-5 | AEE84748.1 | 287 |
| 14. | AtPIP2-1 | AEE79083.1 | 287 |
| 15. | AtPIP2-2 | AEC09362.1 | 285 |
| 16. | AtPIP2-3 | AEC09363.1 | 285 |
| 17. | AtPIP2-4 | Q9FF53.1 | 291 |
| 18. | AtPIP2-5 | Q9SV31.1 | 286 |
| 19. | AtPIP2-6 | Q9ZV07.1 | 289 |
| 20. | AtPIP2-7 | AEE86464.1 | 280 |
| 21. | AtPIP2-8_ | NP179277.1 | 280 |
| 22. | AtPIP3 AA | B36949.1 | 280 |
| 23. | AtSIP1-1 | AEE74036.1 | 240 |
| 24. | AtSIP1-2 | AED92534.1 | 243 |
| 25. | AtSIP2-1 | AEE79591.1 | 237 |
| 26. | AtTIP1-1 | AEC09303.1 | 251 |
| 27. | AtTIP1-2 | AEE77174.1 | 253 |
| 28. | AtTIP1-3 | AEE82031.1 | 252 |
| 29. | AtTIP2-1 | AEE75789.1 | 250 |
| 30. | AtTIP2-2 | AEE83878.1 | 250 |
| 31. | AtTIP2-3 | AED95514.1 | 250 |
| 32. | AtTIP3-1 | AEE35427.1 | 268 |
| 33. | AtTIP3-2_ | O22588.1 | 267 |
| 34. | AtTIP4-1_ | AEC07755.1 | 249 |
| 35. | AtTIP5-1_ | AEE78281.1 | 256 |
| 36. | LjXIP | CCI69207 | 299 |
| 37. | SlXIP | NP001238800 | 328 |
| 38. | OsNIP1_1_ | BAD27715.1 | 284 |
| 39. | OsNIP1_2_ | BAD73177.1 | 303 |
| 40. | OsNIP1_3_ | AAV44140.1 | 286 |
| 41. | OsNIP1_4_ | BAD53665.1 | 273 |
| 42. | OsNIP2_1_ | BAD16128.1 | 298 |
| 43. | OsNIP2_2_ | BAD37471.1 | 298 |
| 44. | OsNIP3_1_ | AAG13499.1 | 241 |
| 45. | OsNIP3_2_ | BAC99758.1 | 305 |
| 46. | OsNIP3_3_ | BAC65382.1 | 278 |
| 47. | OsNIP4_1_ | BAB61180.1 | 286 |
| 48. | OsPIP1_1_ | BAD28398.1 | 289 |
| 49. | OsPIP1_2_ | Q7XSQ9.3 | 288 |
| 50. | OsPIP1_3_ | BAD22920.1 | 288 |
| 51. | OsPIP2_1_ | BAC15868.1 | 290 |
| 52. | OsPIP2_2_ | BAD23735.1 | 288 |
| 53. | OsPIP2_3_ | CAD41442.1 | 290 |
| 54. | OsPIP2_4_ | BAC16113.1 | 286 |
| 55. | OsPIP2_5_ | BAC16116.1 | 283 |
| 56. | OsPIP2_6_ | CAE05002.2 | 282 |
| 57. | OsPIP2_7_ | BAD46581.1 | 290 |
| 58. | OsPIP2_8_ | AAP44741.1 | 280 |
| 59. | OsSIP1_1_ | BAB32914.1 | 177 |
| 60. | OsSIP2_1_ | NP001049950 | 250 |
| 61. | OsTIP1_1_ | AAK98737.1 | 250 |
| 62. | OsTIP1_2_ | BAB63833.1 | 252 |
| 63. | OsTIP2_1_ | BAD25765.1 | 248 |
| 64. | OsTIP2_2_ | BAD61899.1 | 248 |
| 65. | OsTIP3_1_ | AAG13544.1 | 264 |
| 66. | OsTIP3_2_ | CAE05657.2 | 265 |
| 67. | OsTIP4_1_ | AAS98488.1 | 251 |
| 68. | OsTIP4_2_ | BAA92993.1 | 251 |
| 69. | OsTIP4_3_ | BAA92991.1 | 251 |
| 70. | OsTIP5_1_ | NP001053493.1 | 269 |

**Table S3** Details of primers used for the quantitative PCR analysis of *GmNIP2-1* and *GmNIP2-2* genes in roots of soybean plant grown with or without silicon amendment in hydroponic conditions

| **Sr. No.** | **Gene ID** | **Primer ID** | **Primer Sequence** | **Product Size** |
| --- | --- | --- | --- | --- |
| 1 | *Actin* | GmActin-F | GAGCTATGAATTGCCTGATGG | 118 |
| GmActin-R | GCTTTCATGAATTCCAGTAGC |  |
| 2 | *GmNIP2*-*1* | GmNIP2-1F | GAAGGTGATGTTGATTTGGGCGGTG | 149 |
| GmNIP2-1R | CATTTCACTATCCTCCATTTCATCCAAGG |  |
| 3 | *GmNIP2-2* | GmNIP2-2F | TCCAAGACAAGACATTCAAGGGTGTGG | 146 |
| GmNIP2-2R | CATTTCACTATCCTCCATTTCATCCAAGG |  |

**Table S4** Details of results obtained through BLASTp search performed using 70 known MIPs against the amino acid sequences representing soybean proteome

| **Sr. No.** | **BLAST Hit** | **Query** | **E-value** | **Score (bits)** |
| --- | --- | --- | --- | --- |
| 1 | Glyma01g27970 | AtPIP1-2_(NP_001078066.1) | 8.00E-127 | 453 |
| 2 | Glyma01g41670 | AtTIP2-2_(AEE83878.1) | 5.00E-109 | 394 |
| 3 | Glyma01g42950 | AtPIP1-3_(AEE27312.1) | 1.00E-145 | 515 |
| 4 | Glyma02g07680 | AtSIP1-1_(AEE74036.1) | 2.00E-72 | 272 |
| 5 | Glyma02g08110 | AtPIP2-2_(AEC09362.1) | 1.00E-138 | 492 |
| 6 | Glyma02g08120 | AtPIP2-2_(AEC09362.1) | 4.00E-138 | 491 |
| 7 | Glyma02g10520 | AtTIP1-3_(AEE82031.1) | 4.00E-124 | 444 |
| 8 | Glyma02g15870 | AtNIP7-1_(AEE74343.1) | 3.00E-72 | 272 |
| 9 | Glyma02g41400 | AtNIP4-2_(AED94236.1) | 1.00E-82 | 306 |
| 10 | Glyma02g42220 | OsPIP1-2(Q7XSQ9.3) | 2.00E-99 | 362 |
| 11 | Glyma03g14150 | AtPIP1-3_(AEE27312.1) | 6.00E-144 | 510 |
| 12 | Glyma03g27340 | AtSIP2-1_(AEE79591.1) | 4.00E-78 | 291 |
| 13 | Glyma03g33800 | AtPIP2-1_(AEE79083.1) | 3.00E-125 | 448 |
| 14 | Glyma03g34310 | AtTIP1-1_(AEC09303.1) | 1.00E-117 | 422 |
| 15 | Glyma04g00450 | AtPIP2-7_(AEE86464.1) | 2.00E-142 | 505 |
| 16 | Glyma04g08830 | AtTIP4-1(AEC07755.1) | 6.00E-108 | 390 |
| 17 | Glyma05g29500 | AtNIP1-2_(AEE84106.1) | 3.00E-88 | 325 |
| 18 | Glyma05g29510 | AtNIP1-2_(AEE84106.1) | 4.00E-101 | 368 |
| 19 | Glyma05g37730 | OsPIP1-2(Q7XSQ9.3) | 5.00E-148 | 523 |
| 20 | Glyma06g00550 | AtPIP2-7_(AEE86464.1) | 4.00E-140 | 497 |
| 21 | Glyma06g08910 | AtTIP4-1(AEC07755.1) | 1.00E-107 | 389 |
| 22 | Glyma06g46340 | AtSIP1-1_(AEE74036.1) | 8.00E-54 | 210 |
| 23 | Glyma07g02060 | AtTIP2-1_(AEE75789.1) | 1.00E-113 | 409 |
| 24 | Glyma07g02760 | AtNIP6-1_(AEE36445.1) | 4.00E-68 | 258 |
| 25 | Glyma07g02800 | AtNIP6-1_(AEE36445.1) | 1.00E-57 | 224 |
| 26 | Glyma07g03030 | AtNIP6-1_(AEE36445.1) | 2.00E-62 | 239 |
| 27 | Glyma07g34150 | AtNIP4-2_(AED94236.1) | 5.00E-79 | 294 |
| 28 | Glyma08g01860 | OsPIP1-2(Q7XSQ9.3) | 2.00E-148 | 525 |
| 29 | Glyma08g12650 | AtNIP1-2_(AEE84106.1) | 2.00E-96 | 352 |
| 30 | Glyma08g12660 | AtNIP1-2_(AEE84106.1) | 2.00E-102 | 372 |
| 31 | Glyma08g21730 | AtTIP2-1_(AEE75789.1) | 1.00E-113 | 409 |
| 32 | Glyma08g23230 | AtNIP6-1_(AEE36445.1) | 2.00E-121 | 436 |
| 33 | Glyma09g28930 | AtTIP3-1_(AEE35427.1) | 3.00E-105 | 381 |
| 34 | Glyma09g35860 | AtTIP5-1(AEE78281.1) | 4.00E-82 | 304 |
| 35 | Glyma09g37280 | OsNIP2-1(BAD16128.1) | 6.00E-74 | 278 |
| 36 | Glyma10g03870 | AtNIP7-1_(AEE74343.1) | 1.00E-70 | 266 |
| 37 | Glyma10g31750 | AtTIP3-1_(AEE35427.1) | 2.00E-103 | 375 |
| 38 | Glyma10g35520 | AtPIP2-2_(AEC09362.1) | 2.00E-139 | 495 |
| 39 | Glyma10g36560 | AtNIP5-1_(AEE82874.1) | 8.00E-119 | 427 |
| 40 | Glyma10g43680 | AtTIP1-3_(AEE82031.1) | 4.00E-118 | 424 |
| 41 | Glyma11g02530 | AtPIP1-3_(AEE27312.1) | 2.00E-144 | 512 |
| 42 | Glyma11g03690 | AtTIP2-2_(AEE83878.1) | 4.00E-110 | 397 |
| 43 | Glyma11g10350 | LjXIP_(CCI69207.1) | 2.00E-72 | 273 |
| 44 | Glyma11g10360 | LjXIP _(CCI69207.1) | 4.00E-106 | 384 |
| 45 | Glyma11g15200 | AtTIP1-3_(AEE82031.1) | 3.00E-111 | 401 |
| 46 | Glyma11g20600 | OsPIP2-2(BAD23735.1) | 7.00E-137 | 486 |
| 47 | Glyma11g35030 | OsPIP1-2(Q7XSQ9.3) | 4.00E-145 | 514 |
| 48 | Glyma12g01490 | AtTIP5-1(AEE78281.1) | 9.00E-45 | 180 |
| 49 | Glyma12g02640 | LjXIP _(CCI69207.1) | 3.00E-113 | 408 |
| 50 | Glyma12g02650 | LjXIP _(CCI69207.1) | 8.00E-71 | 267 |
| 51 | Glyma12g07120 | AtTIP1-1_(AEC09303.1) | 4.00E-106 | 384 |
| 52 | Glyma12g08040 | OsPIP2-2(BAD23735.1) | 2.00E-136 | 485 |
| 53 | Glyma12g10430 | AtSIP1-1_(AEE74036.1) | 6.00E-54 | 211 |
| 54 | Glyma12g29510 | OsPIP2-2(BAD23735.1) | 6.00E-134 | 477 |
| 55 | Glyma13g01800 | OsNIP1-1(BAD27715.1) | 1.00E-29 | 130 |
| 56 | Glyma13g20940 | AtTIP1-1_(AEC09303.1) | 2.00E-92 | 339 |
| 57 | Glyma13g29690 | AtNIP1-2_(AEE84106.1) | 4.00E-102 | 371 |
| 58 | Glyma13g40100 | OsPIP2-2(BAD23735.1) | 2.00E-134 | 479 |
| 59 | Glyma13g40820 | AtTIP1-3_(AEE82031.1) | 1.00E-113 | 409 |
| 60 | Glyma13g43250 | AtTIP2-1_(AEE75789.1) | 4.00E-108 | 390 |
| 61 | Glyma14g06680 | AtPIP1-4_(Q39196.1) | 1.00E-140 | 499 |
| 62 | Glyma14g07560 | AtNIP4-2_(AED94236.1) | 9.00E-84 | 310 |
| 63 | Glyma14g35030 | OsNIP1-1(BAD27715.1) | 5.00E-55 | 214 |
| 64 | Glyma15g00620 | AtNIP6-1_(AEE36445.1) | 4.00E-126 | 451 |
| 65 | Glyma15g02090 | AtTIP2-1_(AEE75789.1) | 2.00E-109 | 395 |
| 66 | Glyma15g04630 | AtTIP1-3_(AEE82031.1) | 2.00E-64 | 246 |
| 67 | Glyma15g09370 | AtNIP1-2_(AEE84106.1) | 1.00E-100 | 366 |
| 68 | Glyma16g04800 | AtSIP1-1_(AEE74036.1) | 1.00E-79 | 296 |
| 69 | Glyma16g26720 | AtSIP1-1_(AEE74036.1) | 6.00E-73 | 274 |
| 70 | Glyma16g27130 | AtPIP2-2_(AEC09362.1) | 2.00E-138 | 491 |
| 71 | Glyma16g27140 | AtPIP2-2_(AEC09362.1) | 1.00E-138 | 493 |
| 72 | Glyma16g33530 | AtTIP3-1_(AEE35427.1) | 8.00E-106 | 383 |
| 73 | Glyma18g42630 | OsPIP1-2(Q7XSQ9.3) | 4.00E-144 | 511 |
| 74 | Glyma18g49410 | OsNIP2-1(BAD16128.1) | 1.00E-74 | 280 |
| 75 | Glyma18g52360 | AtTIP1-3_(AEE82031.1) | 8.00E-123 | 439 |
| 76 | Glyma19g04450 | AtTIP2-1_(AEE75789.1) | 6.00E-105 | 380 |
| 77 | Glyma19g28430 | AtSIP1-1_(AEE74036.1) | 9.00E-81 | 300 |
| 78 | Glyma19g30320 | AtSIP2-1_(AEE79591.1) | 2.00E-81 | 302 |
| 79 | Glyma19g36530 | AtPIP2-1_(AEE79083.1) | 2.00E-126 | 452 |
| 80 | Glyma19g37000 | AtTIP1-1_(AEC09303.1) | 1.00E-117 | 422 |
| 81 | Glyma20g01750 | AtNIP4-2_(AED94236.1) | 4.00E-35 | 149 |
| 82 | Glyma20g31040 | AtNIP5-1_(AEE82874.1) | 6.00E-95 | 347 |
| 83 | Glyma20g32000 | AtPIP2-5_(Q9SV31.1) | 6.00E-139 | 493 |
| 84 | Glyma20g35860 | AtTIP3-1_(AEE35427.1) | 2.00E-100 | 365 |

**Table S5** Functional annotation of soybean major intrinsic protein performed using BLAST2GO annotation tool

| **Sr. No.** | **Gene_ID** | **Sequence Description** | **min E Value** | **min Sim** | **#GOs** | **InterPro** |
| --- | --- | --- | --- | --- | --- | --- |
| 1 | Glyma01g27970 | mip pip subfamily | 0.00 E+00 | 94.80 | 9 | IPR000425; IPR022357; IPR023271; PTHR19139:SF56 (PANTHER) |
| 2 | Glyma01g41670 | aquaporin tip2-3 | 1.60 E-142 | 92.70 | 3 | IPR000425; IPR022357; IPR023271; PTHR19139:SF57 (PANTHER) |
| 3 | Glyma01g42950 | probable aquaporin pip1-4-like | 0.00 E+00 | 96.50 | 3 | IPR000425; IPR022357; IPR023271; PTHR19139:SF56 (PANTHER) |
| 4 | Glyma02g07680 | mip sip subfamily | 3.10 E-165 | 85.00 | 3 | IPR000425; IPR023271; PTHR19139:SF3 (PANTHER) |
| 5 | Glyma02g08110 | aquaporin pip2-2-like | 0.00 E+00 | 97.00 | 3 | IPR000425; IPR022357; IPR023271; PTHR19139:SF27 (PANTHER) |
| 6 | Glyma02g08120 | aquaporin pip2-2-like | 0.00 E+00 | 96.40 | 3 | IPR000425; IPR022357; IPR023271; PTHR19139:SF27 (PANTHER) |
| 7 | Glyma02g10520 | aquaporin tip1-3-like | 5.40 E-175 | 93.00 | 5 | IPR000425; IPR022357; IPR023271; PTHR19139:SF55 (PANTHER) |
| 8 | Glyma02g15870 | probable aquaporin nip7-1-like | 0.00 E+00 | 79.40 | 3 | IPR000425; IPR022357; IPR023271; PTHR19139:SF23 (PANTHER) |
| 9 | Glyma02g41400 | aquaporin mip family nip subfamily | 2.60 E-150 | 89.80 | 3 | IPR000425; IPR022357; IPR023271; PTHR19139:SF22 (PANTHER) |
| 10 | Glyma02g42220 | aquaporin protein pip11 | 8.50 E-145 | 92.85 | 5 | IPR000425; IPR022357; IPR023271; PTHR19139:SF56 (PANTHER) |
| 11 | Glyma03g14150 | mip pip subfamily | 0.00 E+00 | 95.00 | 3 | IPR000425; IPR022357; IPR023271; PTHR19139:SF56 (PANTHER) |
| 12 | Glyma03g27340 | mip sip subfamily | 6.50 E-153 | 87.60 | 3 | IPR000425; IPR023271; PTHR19139:SF3 (PANTHER) |
| 13 | Glyma03g33800 | aquaporin pip2-1 | 0.00 E+00 | 89.50 | 3 | IPR000425; IPR022357; IPR023271; PTHR19139:SF27 (PANTHER) |
| 14 | Glyma03g34310 | tonoplast intrinsic protein | 1.10 E-150 | 95.20 | 3 | IPR000425; IPR022357; IPR023271; PTHR19139:SF52 (PANTHER), tmhmm (TMHMM) |
| 15 | Glyma04g00450 | aquaporin pip2-7 | 0.00 E+00 | 95.90 | 3 | IPR000425; IPR022357; IPR023271; PTHR19139:SF50 (PANTHER) |
| 16 | Glyma04g08830 | tonoplast intrinsic | 4.70 E-132 | 91.20 | 6 | IPR000425; IPR022357; IPR023271; PTHR19139:SF51 (PANTHER), SignalP-NN(euk) (SIGNALP), tmhmm (TMHMM) |
| 17 | Glyma05g29500 | aquaporin nip1-2 | 3.00 E-136 | 86.30 | 5 | IPR000425; IPR022357; IPR023271; PTHR19139:SF22 (PANTHER) |
| 18 | Glyma05g29510 | aquaporin nip1-2 | 4.90 E-174 | 91.00 | 3 | IPR000425; IPR022357; IPR023271; PTHR19139:SF22 (PANTHER) |
| 19 | Glyma05g37730 | aquaporin pip1-2 | 0.00 E+00 | 95.40 | 3 | IPR000425; IPR022357; IPR023271; PTHR19139:SF56 (PANTHER), tmhmm (TMHMM) |
| 20 | Glyma06g00550 | aquaporin pip2-7 | 0.00 E+00 | 95.20 | 3 | IPR000425; IPR022357; IPR023271; PTHR19139:SF50 (PANTHER) |
| 21 | Glyma06g08910 | tonoplast intrinsic | 2.00 E-140 | 91.10 | 6 | IPR000425; IPR022357; IPR023271; PTHR19139:SF51 (PANTHER) |
| 22 | Glyma06g46340 | mip sip subfamily | 6.10 E-170 | 82.20 | 3 | IPR000425; IPR023271; PTHR19139:SF3 (PANTHER) |
| 23 | Glyma07g02060 | aquaporin tip2-1 | 9.00 E-141 | 93.90 | 3 | IPR000425; IPR022357; IPR023271; PTHR19139:SF58 (PANTHER), SignalP-NN(euk) (SIGNALP), tmhmm (TMHMM) |
| 24 | Glyma07g02760 | mip nip subfamily | 1.00 E-98 | 84.70 | 3 | IPR000425; IPR022357; IPR023271; PTHR19139:SF22 (PANTHER) |
| 25 | Glyma07g02800 | mip nip subfamily | 6.30 E-119 | 81.50 | 3 | IPR000425; IPR023271; PTHR19139:SF22 (PANTHER) |
| 26 | Glyma07g03030 | mip nip subfamily | 3.20 E-102 | 74.60 | 3 | IPR000425; IPR023271; PTHR19139:SF22 (PANTHER) |
| 27 | Glyma07g34150 | mip nip subfamily | 0.00 E+00 | 76.50 | 3 | IPR000425; IPR022357; IPR023271; PTHR19139:SF22 (PANTHER) |
| 28 | Glyma08g01860 | aquaporin pip1-2 | 0.00 E+00 | 94.90 | 3 | IPR000425; IPR022357; IPR023271; PTHR19139:SF56 (PANTHER), tmhmm (TMHMM) |
| 29 | Glyma08g12650 | aquaporin nip1-2 | 0.00 E+00 | 89.30 | 5 | IPR000425; IPR022357; IPR023271; PTHR19139:SF22 (PANTHER) |
| 30 | Glyma08g12660 | aquaporin nip1-2 | 2.00 E-178 | 90.70 | 3 | IPR000425; IPR022357; IPR023271; PTHR19139:SF22 (PANTHER) |
| 31 | Glyma08g21730 | aquaporin tip2-1 | 4.00 E-139 | 93.60 | 3 | IPR000425; IPR022357; IPR023271; PTHR19139:SF58 (PANTHER) |
| 32 | Glyma08g23230 | mip nip subfamily | 0.00 E+00 | 85.00 | 11 | IPR000425; IPR022357; IPR023271; PTHR19139:SF22 (PANTHER) |
| 33 | Glyma09g28930 | probable aquaporin tip-type alpha-like | 7.10 E-170 | 92.10 | 4 | IPR000425; IPR022357; IPR023271; PTHR19139:SF30 (PANTHER), tmhmm (TMHMM) |
| 34 | Glyma09g35860 | probable aquaporin tip5-1-like | 9.40 E-166 | 86.90 | 3 | IPR000425; IPR022357; IPR023271; PTHR19139:SF54 (PANTHER) |
| 35 | Glyma09g37280 | aquaporin nip2-1 | 0.00 E+00 | 79.55 | 4 | IPR000425; IPR022357; IPR023271; PTHR19139:SF22 (PANTHER) |
| 36 | Glyma10g03870 | probable aquaporin nip7-1-like | 0.00 E+00 | 81.00 | 3 | IPR000425; IPR022357; IPR023271; PTHR19139:SF23 (PANTHER) |
| 37 | Glyma10g31750 | probable aquaporin tip-type alpha-like | 2.50 E-167 | 91.00 | 4 | IPR000425; IPR022357; IPR023271; PTHR19139:SF30 (PANTHER), tmhmm (TMHMM) |
| 38 | Glyma10g35520 | aquaporin pip2-2-like isoform 1 | 0.00 E+00 | 95.90 | 3 | IPR000425; IPR022357; IPR023271; PTHR19139:SF27 (PANTHER) |
| 39 | Glyma10g36560 | aquaporin nip3-1 | 0.00 E+00 | 85.80 | 3 | IPR000425; IPR022357; IPR023271; PTHR19139:SF22 (PANTHER) |
| 40 | Glyma10g43680 | aquaporin tip1-3-like | 2.10 E-176 | 91.40 | 5 | IPR000425; IPR022357; IPR023271; PTHR19139:SF55 (PANTHER) |
| 41 | Glyma11g02530 | probable aquaporin pip1-4-like | 0.00 E+00 | 96.40 | 3 | IPR000425; IPR022357; IPR023271; PTHR19139:SF56 (PANTHER) |
| 42 | Glyma11g03690 | aquaporin tip2-3 | 8.70 E-143 | 93.30 | 3 | IPR000425; IPR022357; IPR023271; PTHR19139:SF57 (PANTHER) |
| 43 | Glyma11g10350 | mip pip subfamily | 4.30 E-79 | 82.30 | 3 | IPR000425; IPR023271 |
| 44 | Glyma11g10360 | mip pip subfamily | 4.60 E-166 | 80.00 | 3 | IPR000425; IPR023271; PS51257 (PROFILE) |
| 45 | Glyma11g15200 | aquaporin tip1-1 | 5.30 E-174 | 94.40 | 3 | IPR000425; IPR022357; IPR023271; PTHR19139:SF55 (PANTHER), SignalP-NN(euk) (SIGNALP), tmhmm (TMHMM) |
| 46 | Glyma11g20600 | aquaporin pip2-7 | 0.00 E+00 | 93.10 | 4 | IPR000425; IPR022357; IPR023271; PTHR19139:SF27 (PANTHER), tmhmm (TMHMM) |
| 47 | Glyma11g35030 | aquaporin protein pip11 | 0.00 E+00 | 94.60 | 5 | IPR000425; IPR022357; IPR023271; PTHR19139:SF56 (PANTHER) |
| 48 | Glyma12g01490 | probable aquaporin tip5-1-like | 1.80 E-107 | 63.50 | 4 | IPR000425; IPR022357; IPR023271; PTHR19139:SF54 (PANTHER), tmhmm (TMHMM) |
| 49 | Glyma12g02640 | mip pip subfamily | 0.00 E+00 | 82.10 | 3 | IPR000425; IPR023271 |
| 50 | Glyma12g02650 | mip pip subfamily | 7.00 E-114 | 83.30 | 3 | IPR000425; IPR023271; SignalP-NN(euk) (SIGNALP), tmhmm (TMHMM) |
| 51 | Glyma12g07120 | aquaporin tip1-1 | 1.20 E-166 | 90.10 | 3 | IPR000425; IPR022357; IPR023271; PTHR19139:SF55 (PANTHER) |
| 52 | Glyma12g08040 | aquaporin pip2-7 | 0.00 E+00 | 92.75 | 4 | IPR000425; IPR022357; IPR023271; PTHR19139:SF27 (PANTHER) |
| 53 | Glyma12g10430 | mip sip subfamily | 2.80 E-169 | 81.50 | 3 | IPR000425; IPR023271; PTHR19139:SF3 (PANTHER) |
| 54 | Glyma12g29510 | aquaporin pip2-7 | 0.00 E+00 | 93.55 | 4 | IPR000425; IPR022357; IPR023271; PTHR19139:SF27 (PANTHER) |
| 55 | Glyma13g01800 | aquaporin nip1-2 | 2.90 E-85 | 52.65 | 1 | IPR000425; IPR023271; PTHR19139:SF22 (PANTHER) |
| 56 | Glyma13g20940 | tonoplast intrinsic protein | 1.50 E-159 | 81.50 | 3 | IPR000425; IPR022357; IPR023271; PTHR19139:SF52 (PANTHER) |
| 57 | Glyma13g29690 | aquaporin nip1-2 | 0.00 E+00 | 92.20 | 3 | IPR000425; IPR022357; IPR023271; PTHR19139:SF22 (PANTHER) |
| 58 | Glyma13g40100 | aquaporin pip2-7 | 0.00 E+00 | 93.55 | 4 | IPR000425; IPR022357; IPR023271; PTHR19139:SF27 (PANTHER), tmhmm (TMHMM) |
| 59 | Glyma13g40820 | aquaporin tip1-1 | 1.50 E-174 | 93.20 | 3 | IPR000425; IPR022357; IPR023271; PTHR19139:SF55 (PANTHER) |
| 60 | Glyma13g43250 | aquaporin tip2-1-like | 2.80 E-143 | 94.30 | 3 | IPR000425; IPR022357; IPR023271; PTHR19139:SF58 (PANTHER), SignalP-NN(euk) (SIGNALP), tmhmm (TMHMM) |
| 61 | Glyma14g06680 | probable aquaporin pip-type 7a-like | 0.00 E+00 | 95.10 | 5 | IPR000425; IPR022357; IPR023271; PTHR19139:SF56 (PANTHER) |
| 62 | Glyma14g07560 | aquaporin mip family nip subfamily | 1.10 E-150 | 90.20 | 3 | IPR000425; IPR022357; IPR023271; PTHR19139:SF22 (PANTHER) |
| 63 | Glyma14g35030 | aquaporin nip1-2 | 4.30 E-154 | 74.20 | 3 | IPR000425; IPR022357; IPR023271; PTHR19139:SF22 (PANTHER), SignalP-NN(euk) (SIGNALP), tmhmm (TMHMM) |
| 64 | Glyma15g00620 | mip nip subfamily | 9.90 E-150 | 88.50 | 3 | IPR000425; IPR022357; IPR023271; PTHR19139:SF22 (PANTHER) |
| 65 | Glyma15g02090 | aquaporin tip2-1-like | 7.90 E-148 | 94.20 | 3 | IPR000425; IPR022357; IPR023271; PTHR19139:SF58 (PANTHER) |
| 66 | Glyma15g04630 | aquaporin tip1-1 | 4.20 E-97 | 94.40 | 3 | IPR000425; IPR022357; IPR023271; PTHR19139:SF55 (PANTHER), SignalP-NN(euk) (SIGNALP), tmhmm (TMHMM) |
| 67 | Glyma15g09370 | aquaporin nip1-2 | 0.00 E+00 | 92.30 | 3 | IPR000425; IPR022357; IPR023271; PTHR19139:SF22 (PANTHER) |
| 68 | Glyma16g04800 | mip sip subfamily | 6.10 E-127 | 87.20 | 3 | IPR000425; IPR023271; PTHR19139:SF3 (PANTHER) |
| 69 | Glyma16g26720 | mip sip subfamily | 1.50 E-163 | 85.40 | 3 | IPR000425; IPR023271; PTHR19139:SF3 (PANTHER) |
| 70 | Glyma16g27130 | aquaporin pip2-2-like | 0.00 E+00 | 97.00 | 3 | IPR000425; IPR022357; IPR023271; PTHR19139:SF27 (PANTHER) |
| 71 | Glyma16g27140 | aquaporin pip2-2-like | 0.00 E+00 | 97.00 | 3 | IPR000425; IPR022357; IPR023271; PTHR19139:SF27 (PANTHER) |
| 72 | Glyma16g33530 | probable aquaporin tip-type alpha-like | 4.80 E-147 | 92.40 | 4 | IPR000425; IPR022357; IPR023271; PTHR19139:SF30 (PANTHER), tmhmm (TMHMM) |

**Table S6** Details of transmembrane domains identified in soybean MIPs using TMHMM and SOSUI servers.

| **Gene ID** | **length** | **TMHMM** | | | **SOSUI** | | **Max TM** |
| --- | --- | --- | --- | --- | --- | --- | --- |
| **ExpAA** | **First60** | **TMH** | **prediction** | **TMH** |
| Glyma01g27970 | 254 | 110.27 | 7.92 | 5 | Membrane | 5 | 5 |
| Glyma01g41670 | 249 | 146.42 | 28.58 | 7 | Membrane | 6 | 7 |
| Glyma01g42950 | 286 | 129.39 | 8.24 | 6 | Membrane | 6 | 6 |
| Glyma02g07680 | 247 | 134.96 | 32.44 | 6 | Membrane | 6 | 6 |
| Glyma02g08110 | 285 | 136.57 | 22.39 | 6 | Membrane | 5 | 6 |
| Glyma02g08120 | 285 | 136.26 | 22.39 | 6 | Membrane | 5 | 6 |
| Glyma02g10520 | 252 | 136.59 | 25.27 | 7 | Membrane | 6 | 7 |
| Glyma02g15870 | 293 | 135.34 | 1.3 | 6 | Membrane | 6 | 6 |
| Glyma02g41400 | 215 | 127.28 | 37.26 | 7 | Membrane | 6 | 7 |
| Glyma02g42220 | 316 | 118.74 | 3.26 | 5 | Membrane | 6 | 6 |
| Glyma03g14150 | 284 | 131.97 | 7.76 | 6 | Membrane | 6 | 6 |
| Glyma03g27340 | 230 | 106.82 | 41.2 | 5 | Membrane | 5 | 5 |
| Glyma03g33800 | 286 | 131.1 | 20.75 | 6 | Membrane | 6 | 6 |
| Glyma03g34310 | 250 | 146.85 | 25.76 | 6 | Membrane | 6 | 6 |
| Glyma04g00450 | 275 | 131.57 | 22.17 | 6 | Membrane | 6 | 6 |
| Glyma04g08830 | 246 | 145.39 | 34.01 | 7 | Membrane | 6 | 7 |
| Glyma05g29500 | 243 | 108.35 | 36.71 | 5 | Membrane | 5 | 5 |
| Glyma05g29510 | 270 | 127.53 | 20.52 | 6 | Membrane | 6 | 6 |
| Glyma05g37730 | 287 | 129.5 | 7.26 | 6 | Membrane | 6 | 6 |
| Glyma06g00550 | 278 | 131.09 | 22.14 | 6 | Membrane | 6 | 6 |
| Glyma06g08910 | 246 | 146.91 | 33.93 | 7 | Membrane | 6 | 7 |
| Glyma06g46340 | 239 | 119.37 | 40.82 | 5 | Membrane | 4 | 5 |
| Glyma07g02060 | 248 | 150.6 | 29.25 | 6 | Membrane | 6 | 6 |
| Glyma07g02760 | 181 | 89.55 | 21.1 | 4 | Membrane | 4 | 4 |
| Glyma07g02800 | 184 | 88.82 | 22.33 | 4 | Soluble | - | 4 |
| Glyma07g03030 | 248 | 111.63 | 18.49 | 5 | Membrane | 5 | 5 |
| Glyma07g34150 | 268 | 148.68 | 24.92 | 7 | Membrane | 7 | 7 |
| Glyma08g01860 | 289 | 129.71 | 5.27 | 6 | Membrane | 6 | 6 |
| Glyma08g12650 | 271 | 125.96 | 17.48 | 6 | Membrane | 6 | 6 |
| Glyma08g12660 | 274 | 128.16 | 20.13 | 6 | Membrane | 6 | 6 |
| Glyma08g21730 | 248 | 150.52 | 29.25 | 7 | Membrane | 6 | 7 |
| Glyma08g23230 | 306 | 127 | 0.07 | 5 | Membrane | 6 | 6 |
| Glyma09g28930 | 255 | 137.08 | 23.61 | 6 | Membrane | 6 | 6 |
| Glyma09g35860 | 247 | 141.02 | 25.84 | 6 | Membrane | 7 | 7 |
| Glyma09g37280 | 293 | 111.35 | 9.14 | 5 | Membrane | 6 | 6 |
| Glyma10g03870 | 276 | 136.03 | 17.84 | 6 | Membrane | 6 | 6 |
| Glyma10g31750 | 254 | 125.38 | 16.25 | 5 | Membrane | 6 | 6 |
| Glyma10g35520 | 296 | 138.42 | 11.6 | 6 | Membrane | 5 | 6 |
| Glyma10g36560 | 290 | 117.55 | 0 | 5 | Membrane | 6 | 6 |
| Glyma10g43680 | 252 | 144.48 | 26.31 | 7 | Membrane | 6 | 7 |
| Glyma11g02530 | 286 | 130.27 | 8.39 | 6 | Membrane | 6 | 6 |
| Glyma11g03690 | 249 | 147.89 | 28.65 | 7 | Membrane | 6 | 7 |
| Glyma11g10350 | 201 | 101.69 | 43.77 | 5 | Membrane | 5 | 5 |
| Glyma11g10360 | 270 | 137.76 | 42.9 | 6 | Membrane | 6 | 6 |
| Glyma11g15200 | 252 | 142.28 | 25.05 | 6 | Membrane | 6 | 6 |
| Glyma11g20600 | 286 | 132.3 | 19.87 | 6 | Membrane | 5 | 6 |
| Glyma11g35030 | 289 | 127.84 | 4.35 | 6 | Membrane | 6 | 6 |
| Glyma12g01490 | 187 | 93.33 | 24.67 | 4 | Membrane | 4 | 4 |
| Glyma12g02640 | 312 | 128.16 | 12.01 | 6 | Membrane | 6 | 6 |
| Glyma12g02650 | 170 | 70.04 | 24.69 | 3 | Membrane | 5 | 5 |
| Glyma12g07120 | 245 | 140.83 | 25.15 | 6 | Membrane | 7 | 7 |
| Glyma12g08040 | 286 | 131.95 | 19.85 | 6 | Membrane | 5 | 6 |
| Glyma12g10430 | 239 | 126.72 | 42.71 | 6 | Membrane | 6 | 6 |
| Glyma12g29510 | 287 | 128.51 | 19.78 | 6 | Membrane | 6 | 6 |
| Glyma13g01800 | 226 | 90.54 | 40.03 | 4 | Membrane | 5 | 5 |
| Glyma13g20940 | 250 | 134.45 | 26.93 | 6 | Membrane | 6 | 6 |
| Glyma13g29690 | 273 | 131.67 | 17.5 | 6 | Membrane | 6 | 6 |
| Glyma13g40100 | 287 | 129.38 | 19.77 | 6 | Membrane | 6 | 6 |
| Glyma13g40820 | 252 | 142.21 | 24.73 | 7 | Membrane | 6 | 7 |
| Glyma13g43250 | 247 | 138.23 | 28.77 | 6 | Membrane | 6 | 6 |
| Glyma14g06680 | 289 | 124.82 | 3.33 | 6 | Membrane | 6 | 6 |
| Glyma14g07560 | 216 | 133.11 | 42.17 | 7 | Membrane | 6 | 7 |
| Glyma14g35030 | 221 | 115.45 | 37.8 | 5 | Membrane | 6 | 6 |
| Glyma15g00620 | 304 | 130.07 | 0.09 | 6 | Membrane | 6 | 6 |
| Glyma15g02090 | 247 | 138.37 | 28.83 | 6 | Membrane | 6 | 6 |
| Glyma15g04630 | 153 | 97.18 | 33.89 | 4 | Membrane | 4 | 4 |
| Glyma15g09370 | 267 | 131.86 | 22.24 | 6 | Membrane | 6 | 6 |
| Glyma16g04800 | 248 | 132.52 | 32.56 | 6 | Membrane | 6 | 6 |
| Glyma16g26720 | 245 | 134.93 | 32.78 | 6 | Membrane | 6 | 6 |
| Glyma16g27130 | 285 | 136.53 | 22.36 | 6 | Membrane | 5 | 6 |
| Glyma16g27140 | 285 | 136.54 | 22.36 | 6 | Membrane | 5 | 6 |
| Glyma16g33530 | 255 | 138.09 | 21.97 | 6 | Membrane | 6 | 6 |
| Glyma18g42630 | 304 | 129.29 | 0 | 6 | Membrane | 5 | 6 |
| Glyma18g49410 | 295 | 109.15 | 7.18 | 5 | Membrane | 6 | 6 |
| Glyma18g52360 | 252 | 135.82 | 25.69 | 6 | Membrane | 6 | 6 |
| Glyma19g04450 | 237 | 137.64 | 28.6 | 6 | Membrane | 6 | 6 |
| Glyma19g28430 | 248 | 131.98 | 33.97 | 6 | Membrane | 6 | 6 |
| Glyma19g30320 | 236 | 104.51 | 40.74 | 5 | Membrane | 5 | 5 |
| Glyma19g36530 | 285 | 130.19 | 20.86 | 6 | Membrane | 6 | 6 |
| Glyma19g37000 | 250 | 151.09 | 26.7 | 7 | Membrane | 6 | 7 |
| Glyma20g01750 | 238 | 131.76 | 35.07 | 6 | Membrane | 6 | 6 |
| Glyma20g31040 | 263 | 111.47 | 0.04 | 5 | Soluble | - | 5 |
| Glyma20g32000 | 284 | 134.13 | 20.84 | 6 | Membrane | 5 | 6 |
| Glyma20g35860 | 254 | 128.59 | 19.09 | 6 | Membrane | 6 | 6 |

ExpAA: The expected number of amino acids in transmembrane helices.

First60: The expected number of amino acids in transmembrane helices in the first 60 amino acids of the protein.

TMH: The number of predicted transmembrane helices.

MAX TMH: The maximum number among the TMH predicted by TMHMM and SOSUI

**Table S7** Details of transmembrane domains identified using TMHMM and SOSUI servers in the 70 MIPs including rice, Arabidopsis, lotus and tomato.

| **Sr. No.** | **Gene ID** | | **NCBI Acc. No.** | | **Protein**  **Length** | | **TMHMM** | | | | | | **SOSUI** | | | | **MAX TMH** | |
| --- | --- | --- | --- | --- | --- | --- | --- | --- | --- | --- | --- | --- | --- | --- | --- | --- | --- | --- |
| **ExpAA** | | **First60** | | **TMH** | | **prediction** | | **TMH** | |
|  | | AtNIP1-1 | | AEE84127.1 | | 296 | | 130.88 | | 3.76 | | 6 | | Membrane | | 6 | | 6 |
|  | | AtNIP1-2 | | AEE84106.1 | | 294 | | 123.04 | | 5.74 | | 6 | | Membrane | | 6 | | 6 |
|  | | AtNIP2-1 | | CAC81707.2 | | 288 | | 110.88 | | 10.22 | | 5 | | Membrane | | 6 | | 6 |
|  | | AtNIP3-1 | | AEE31413.1 | | 323 | | 127.52 | | 14.96 | | 6 | | Membrane | | 6 | | 6 |
|  | | AtNIP4-2 | | AED94236.1 | | 283 | | 132.12 | | 10.84 | | 6 | | Membrane | | 6 | | 6 |
|  | | AtNIP5-1 | | AEE82874.1 | | 304 | | 120.77 | | 0.8 | | 5 | | Membrane | | 6 | | 6 |
|  | | AtNIP6-1 | | AEE36445.1 | | 305 | | 127.7 | | 0.03 | | 6 | | Membrane | | 6 | | 6 |
|  | | AtNIP7-1 | | AEE74343.1 | | 275 | | 143.19 | | 13.4 | | 6 | | Membrane | | 6 | | 6 |
|  | | AtPIP1-1 | | AEE80201.1 | | 286 | | 129.83 | | 7.79 | | 6 | | Membrane | | 6 | | 6 |
|  | | AtPIP1-2 | | NP001078066.1 | | 274 | | 108.17 | | 8.66 | | 5 | | Membrane | | 5 | | 5 |
|  | | AtPIP1-3 | | AEE27312.1 | | 286 | | 130.86 | | 7.41 | | 6 | | Membrane | | 6 | | 6 |
|  | | AtPIP1-4 | | Q39196.1 | | 287 | | 130.83 | | 6.43 | | 6 | | Membrane | | 6 | | 6 |
|  | | AtPIP1-5 | | AEE84748.1 | | 287 | | 131.24 | | 6.9 | | 6 | | Membrane | | 5 | | 6 |
|  | | AtPIP2-1 | | AEE79083.1 | | 287 | | 134.9 | | 20.74 | | 6 | | Membrane | | 5 | | 6 |
|  | | AtPIP2-2 | | AEC09362.1 | | 285 | | 137.58 | | 22.38 | | 6 | | Membrane | | 5 | | 6 |
|  | | AtPIP2-3 | | AEC09363.1 | | 285 | | 138.22 | | 22.2 | | 6 | | Membrane | | 5 | | 6 |
|  | | AtPIP2-4 | | Q9FF53.1 | | 291 | | 133.06 | | 21.09 | | 6 | | Membrane | | 5 | | 6 |
|  | | AtPIP2-5 | | Q9SV31.1 | | 286 | | 135.64 | | 21.76 | | 6 | | Membrane | | 6 | | 6 |
|  | | AtPIP2-6 | | Q9ZV07.1 | | 289 | | 141.12 | | 21.89 | | 6 | | Membrane | | 5 | | 6 |
|  | | AtPIP2-7 | | AEE86464.1 | | 280 | | 131.52 | | 22 | | 6 | | Membrane | | 4 | | 6 |
|  | | AtPIP2-8_ | | NP179277.1 | | 280 | | 131.52 | | 22 | | 6 | | Membrane | | 5 | | 6 |
|  | | AtPIP3 AA | | B36949.1 | | 280 | | 132.61 | | 22.08 | | 6 | | Membrane | | 4 | | 6 |
|  | | AtSIP1-1 | | AEE74036.1 | | 240 | | 131.94 | | 38.39 | | 6 | | Membrane | | 6 | | 6 |
|  | | AtSIP1-2 | | AED92534.1 | | 243 | | 122.5 | | 39.19 | | 5 | | Membrane | | 5 | | 5 |
|  | | AtSIP2-1 | | AEE79591.1 | | 237 | | 121.28 | | 38.93 | | 6 | | Membrane | | 5 | | 6 |
|  | | AtTIP1-1 | | AEC09303.1 | | 251 | | 154.17 | | 25.42 | | 7 | | Membrane | | 6 | | 7 |
|  | | AtTIP1-2 | | AEE77174.1 | | 253 | | 147.62 | | 25.42 | | 7 | | Membrane | | 6 | | 7 |
|  | | AtTIP1-3 | | AEE82031.1 | | 252 | | 143.36 | | 25.97 | | 7 | | Membrane | | 6 | | 7 |
|  | | AtTIP2-1 | | AEE75789.1 | | 250 | | 148.24 | | 28.92 | | 6 | | Membrane | | 6 | | 6 |
|  | | AtTIP2-2 | | AEE83878.1 | | 250 | | 142.43 | | 28.27 | | 6 | | Membrane | | 6 | | 6 |
|  | | AtTIP2-3 | | AED95514.1 | | 250 | | 142.63 | | 28.19 | | 6 | | Membrane | | 7 | | 7 |
|  | | AtTIP3-1 | | AEE35427.1 | | 268 | | 126.67 | | 12.96 | | 5 | | Membrane | | 6 | | 6 |
|  | | AtTIP3-2_ | | O22588.1 | | 267 | | 131.42 | | 19.11 | | 6 | | Membrane | | 6 | | 6 |
|  | | AtTIP4-1_ | | AEC07755.1 | | 249 | | 149.49 | | 33.76 | | 7 | | Membrane | | 6 | | 7 |
|  | | AtTIP5-1_ | | AEE78281.1 | | 256 | | 135.69 | | 26.01 | | 6 | | Membrane | | 7 | | 7 |
|  | | LjXIP | | CCI69207 | | 299 | | 132.13 | | 9.67 | | 6 | | Membrane | | 7 | | 7 |
|  | | SlXIP | | NP001238800 | | 328 | | 147.59 | | 0 | | 6 | | Membrane | | 6 | | 6 |
|  | | OsNIP1_1_ | | BAD27715.1 | | 284 | | 129.06 | | 10.55 | | 6 | | Membrane | | 6 | | 6 |
|  | | OsNIP1_2_ | | BAD73177.1 | | 303 | | 134.58 | | 0 | | 6 | | Membrane | | 6 | | 6 |
|  | | OsNIP1_3_ | | AAV44140.1 | | 286 | | 118.56 | | 5.08 | | 5 | | Membrane | | 6 | | 6 |
|  | | OsNIP1_4_ | | BAD53665.1 | | 273 | | 136.7 | | 4.59 | | 6 | | Membrane | | 6 | | 6 |
|  | | OsNIP2_1_ | | BAD16128.1 | | 298 | | 131.92 | | 9.04 | | 6 | | Membrane | | 6 | | 6 |
|  | | OsNIP2_2_ | | BAD37471.1 | | 298 | | 132.14 | | 6.28 | | 6 | | Membrane | | 6 | | 6 |
|  | | OsNIP3_1_ | | AAG13499.1 | | 241 | | 135.73 | | 38.9 | | 6 | | Membrane | | 6 | | 6 |
|  | | OsNIP3_2_ | | BAC99758.1 | | 305 | | 127.25 | | 0.01 | | 6 | | Membrane | | 6 | | 6 |
|  | | OsNIP3_3_ | | BAC65382.1 | | 278 | | 129.96 | | 0 | | 6 | | Membrane | | 6 | | 6 |
|  | | OsNIP4_1_ | | BAB61180.1 | | 286 | | 133.85 | | 5.72 | | 6 | | Membrane | | 6 | | 6 |
|  | | OsPIP1_1_ | | BAD28398.1 | | 289 | | 129.9 | | 4.26 | | 6 | | Membrane | | 6 | | 6 |
|  | | OsPIP1_2_ | | Q7XSQ9.3 | | 288 | | 128.03 | | 5.42 | | 6 | | Membrane | | 5 | | 6 |
|  | | OsPIP1_3_ | | BAD22920.1 | | 288 | | 127.31 | | 5.37 | | 6 | | Membrane | | 6 | | 6 |
|  | | OsPIP2_1_ | | BAC15868.1 | | 290 | | 138.44 | | 17.97 | | 6 | | Membrane | | 6 | | 6 |
|  | | OsPIP2_2_ | | BAD23735.1 | | 288 | | 134.46 | | 18.84 | | 6 | | Membrane | | 5 | | 6 |
|  | | OsPIP2_3_ | | CAD41442.1 | | 290 | | 131.9 | | 17.89 | | 6 | | Membrane | | 5 | | 6 |
|  | | OsPIP2_4_ | | BAC16113.1 | | 286 | | 144.65 | | 20.81 | | 7 | | Membrane | | 5 | | 7 |
|  | | OsPIP2_5_ | | BAC16116.1 | | 283 | | 135.24 | | 22.23 | | 6 | | Membrane | | 5 | | 6 |
|  | | OsPIP2_6_ | | CAE05002.2 | | 282 | | 135.34 | | 21.56 | | 6 | | Membrane | | 5 | | 6 |
|  | | OsPIP2_7_ | | BAD46581.1 | | 290 | | 136.82 | | 16.2 | | 6 | | Membrane | | 6 | | 6 |
|  | | OsPIP2_8_ | | AAP44741.1 | | 280 | | 129.04 | | 20.27 | | 6 | | Membrane | | 6 | | 6 |
|  | | OsSIP1_1_ | | BAB32914.1 | | 177 | | 71.95 | | 40.8 | | 3 | | Membrane | | 3 | | 3 |
|  | | OsSIP2_1_ | | NP001049950 | | 250 | | 120.71 | | 27.96 | | 6 | | Membrane | | 5 | | 6 |
|  | | OsTIP1_1_ | | AAK98737.1 | | 250 | | 144.99 | | 27.08 | | 6 | | Membrane | | 6 | | 6 |
|  | | OsTIP1_2_ | | BAB63833.1 | | 252 | | 154.68 | | 26.4 | | 7 | | Membrane | | 7 | | 7 |
|  | | OsTIP2_1_ | | BAD25765.1 | | 248 | | 137.64 | | 29.18 | | 6 | | Membrane | | 6 | | 6 |
|  | | OsTIP2_2_ | | BAD61899.1 | | 248 | | 141.92 | | 26.86 | | 6 | | Membrane | | 6 | | 6 |
|  | | OsTIP3_1_ | | AAG13544.1 | | 264 | | 132.43 | | 20.96 | | 6 | | Membrane | | 5 | | 6 |
|  | | OsTIP3_2_ | | CAE05657.2 | | 265 | | 127.16 | | 19.87 | | 6 | | Membrane | | 6 | | 6 |
|  | | OsTIP4_1_ | | AAS98488.1 | | 251 | | 134.42 | | 27.65 | | 6 | | Membrane | | 6 | | 6 |
|  | | OsTIP4_2_ | | BAA92993.1 | | 251 | | 135.96 | | 29.99 | | 6 | | Membrane | | 6 | | 6 |
|  | | OsTIP4_3_ | | BAA92991.1 | | 251 | | 132.73 | | 29.19 | | 6 | | Membrane | | 6 | | 6 |
|  | | OsTIP5_1_ | | NP001053493.1 | | 269 | | 143.95 | | 28.71 | | 6 | | Soluble | | 0 | | 6 |

ExpAA: The expected number of amino acids in transmembrane helices.

First60: The expected number of amino acids in transmembrane helices in the first 60 amino acids of the protein.

TMH: The number of predicted transmembrane helices.

MAX TMH: The maximum number among the TMH predicted by TMHMM and SOSUI

**Table S8** Details of predicted sub-cellular location of soybean major intrinsic protein identified by using Wolfpsort, Cello and TargetP servers

| **Gene_ID** | **Wolfpsort1** | **Cello2** | **TargetP3** |
| --- | --- | --- | --- |
| NIP1-1 | Vacuole | plasma membrane | _ |
| NIP1-2 | Vacuole | plasma membrane | _ |
| NIP1-3 | Vacuole | plasma membrane | _ |
| NIP1-4 | Extra | plasma membrane | Secretory |
| NIP1-5 | Vacuole | plasma membrane | _ |
| NIP1-6 | plasma membrane | plasma membrane | _ |
| NIP1-7 | Cytoplasm | plasma membrane | Secretory |
| NIP1-8 | plasma membrane | plasma membrane | _ |
| NIP1-9 | Vacuole | plasma membrane | _ |
| NIP1-10 | plasma membrane | plasma membrane | _ |
| NIP1-11 | plasma membrane | plasma membrane | _ |
| NIP1-12 | plasma membrane | plasma membrane | _ |
| NIP2-1 | plasma membrane | plasma membrane | Chloroplast |
| NIP2-2 | plasma membrane | plasma membrane | Chloroplast |
| NIP3-1 | plasma membrane | plasma membrane | Chloroplast |
| NIP3-2 | plasma membrane | plasma membrane | Chloroplast |
| NIP3-3 | Cytoplasm | plasma membrane | _ |
| NIP3-4 | plasma membrane | plasma membrane | _ |
| NIP3-5 | plasma membrane | plasma membrane | _ |
| NIP3-6 | plasma membrane | plasma membrane | Chloroplast |
| NIP4-1 | plasma membrane | plasma membrane | _ |
| NIP4-2 | plasma membrane | plasma membrane | Secretory |
| PIP1-1 | plasma membrane | plasma membrane | _ |
| PIP1-2 | plasma membrane | plasma membrane | _ |
| PIP1-3 | plasma membrane | plasma membrane | _ |
| PIP1-4 | plasma membrane | plasma membrane | _ |
| PIP1-5 | plasma membrane | plasma membrane | _ |
| PIP1-6 | plasma membrane | plasma membrane | _ |
| PIP1-7 | plasma membrane | plasma membrane | _ |
| PIP1-8 | plasma membrane | plasma membrane | _ |
| PIP2-1 | plasma membrane | plasma membrane | _ |
| PIP2-2 | plasma membrane | plasma membrane | _ |
| PIP2-3 | plasma membrane | plasma membrane | _ |
| PIP2-4 | plasma membrane | plasma membrane | _ |
| PIP2-5 | plasma membrane | plasma membrane | _ |
| PIP2-6 | plasma membrane | plasma membrane | _ |
| PIP2-7 | plasma membrane | plasma membrane | _ |
| PIP2-8 | plasma membrane | plasma membrane | _ |
| PIP2-9 | plasma membrane | plasma membrane | _ |
| PIP2-10 | plasma membrane | plasma membrane | _ |
| PIP2-11 | plasma membrane | plasma membrane | _ |
| PIP2-12 | plasma membrane | plasma membrane | _ |
| PIP2-13 | plasma membrane | plasma membrane | _ |
| PIP2-14 | plasma membrane | plasma membrane | _ |
| SIP1-1 | Vacuole | plasma membrane | Secretory |
| SIP1-2 | Vacuole | plasma membrane | Secretory |
| SIP1-3 | plasma membrane | plasma membrane | Secretory |
| SIP1-4 | plasma membrane | plasma membrane | Secretory |
| SIP1-5 | plasma membrane | plasma membrane | _ |
| SIP1-6 | plasma membrane | plasma membrane | Secretory |
| SIP2-1 | plasma membrane | plasma membrane | Secretory |
| SIP2-2 | Vacuole | plasma membrane | Secretory |
| TIP1-1 | Endoplasmic reticulum | plasma membrane | Mitochondrion |
| TIP1-2 | Cytoplasm | plasma membrane | _ |
| TIP1-3 | Cytoplasm | plasma membrane | _ |
| TIP1-4 | Vacuole | plasma membrane | _ |
| TIP1-5 | Vacuole | plasma membrane | _ |
| TIP1-6 | Vacuole | plasma membrane | _ |
| TIP1-7 | plasma membrane | plasma membrane | Mitochondrion |
| TIP1-8 | Cytoplasm | plasma membrane | _ |
| TIP1-9 | Cytoplasm | plasma membrane | _ |
| TIP2-1 | plasma membrane | plasma membrane | Secretory |
| TIP2-2 | Cytoplasm | plasma membrane | Secretory |
| TIP2-3 | plasma membrane | plasma membrane | Secretory |
| TIP2-4 | Vacuole | plasma membrane | _ |
| TIP2-5 | Vacuole | plasma membrane | _ |
| TIP2-6 | plasma membrane | plasma membrane | Secretory |
| TIP2-7 | plasma membrane | plasma membrane | Secretory |
| TIP3-1 | Cytoplasm | plasma membrane | _ |
| TIP3-2 | Cytoplasm | plasma membrane | _ |
| TIP3-3 | Mitochondrion | plasma membrane | _ |
| TIP3-4 | Cytoplasm | plasma membrane | _ |
| TIP4-1 | Cytoplasm | plasma membrane | _ |
| TIP4-2 | Vacuole | plasma membrane | _ |
| TIP5-1 | Chloroplast | plasma membrane | _ |
| XIP1-1 | Cytoplasm | plasma membrane | _ |
| XIP2-1 | Extra | plasma membrane | _ |

1<http://wolfpsort.org/>, 2<http://cello.life.nctu.edu.tw>, 3[www.cbs.dtu.dk/services/TargetP](http://www.cbs.dtu.dk/services/TargetP),

**Table S9** Details of serine phosphorylation sites detected in major intrinsic proteins of soybean. The Z score was estimated by an artificial neural network method using NetPhos 2.0 Server phosphorylation prediction server (http://www.cbs.dtu.dk)

| **Gene_ID** | **Protein Size** | **Phosphorylation sites** | **Serine Position** | **Sequence** | **Z score** |
| --- | --- | --- | --- | --- | --- |
| PIP1-1 | 284 | 6 | 46 | GELSSWSFY | 0.641 |
|  |  |  | 79 | FKSKSKCST | 0.914 |
|  |  |  | 127 | ARKLSLTRA | 0.928 |
|  |  |  | 193 | YTVFSATDA | 0.977 |
|  |  |  | 204 | NARDSHVPI | 0.993 |
|  |  |  | 238 | NPARSLGAA | 0.925 |
|  |  |  | 282 | AIPFSSK-- | 0.905 |
| PIP1-2 | 287 | 8 | 49 | RELTSWSFY | 0.932 |
|  |  |  | 80 | GVAKSPSKC | 0.927 |
|  |  |  | 82 | AKSPSKCST | 0.878 |
|  |  |  | 130 | ARKLSLTRT | 0.983 |
|  |  |  | 175 | SKGYSKGDG | 0.991 |
|  |  |  | 196 | YTVFSATDA | 0.977 |
|  |  |  | 207 | NARDSHVPI | 0.993 |
|  |  |  | 241 | NPARSLGAA | 0.928 |
| PIP1-3 | 286 | 7 | 15 | AQKFSERQA | 0.827 |
|  |  |  | 26 | TGAKSDKDY | 0.998 |
|  |  |  | 46 | GELKSWSFY | 0.789 |
|  |  |  | 127 | ARKLSLTRA | 0.962 |
|  |  |  | 194 | YTVFSATDA | 0.977 |
|  |  |  | 205 | NARDSHVPI | 0.993 |
|  |  |  | 239 | NPARSLGAA | 0.925 |
| PIP1-4 | 286 | 6 | 15 | AQKFSERQA | 0.827 |
|  |  |  | 46 | GELKSWSFY | 0.789 |
|  |  |  | 127 | ARKLSLTRA | 0.926 |
|  |  |  | 194 | YTVFSATDA | 0.977 |
|  |  |  | 205 | NARDSHVPI | 0.993 |
|  |  |  | 239 | NPARSLGAA | 0.925 |
| PIP1-5 | 287 | 9 | 16 | ATKFSERQP | 0.871 |
|  |  |  | 47 | GELKSWSFY | 0.789 |
|  |  |  | 78 | GVNRSPSKC | 0.577 |
|  |  |  | 80 | NRSPSKCAS | 0.989 |
|  |  |  | 128 | ARKLSLTRA | 0.926 |
|  |  |  | 195 | YTVFSATDA | 0.977 |
|  |  |  | 206 | NARDSHVPI | 0.993 |
|  |  |  | 240 | NPARSLGAA | 0.925 |
| PIP1-6 | 289 | 8 | 16 | ANKFSERQP | 0.692 |
|  |  |  | 49 | GELKSWSFY | 0.789 |
|  |  |  | 80 | GVNRSPSKC | 0.577 |
|  |  |  | 82 | NRSPSKCAS | 0.989 |
|  |  |  | 130 | ARKLSLTRA | 0.926 |
|  |  |  | 197 | YTVFSATDA | 0.977 |
|  |  |  | 208 | NARDSHVPI | 0.993 |
|  |  |  | 242 | NPARSLGAA | 0.925 |
| PIP1-7 | 289 | 11 | 9 | EEDVSLGAN | 0.959 |
|  |  |  | 16 | ANKFSERQP | 0.692 |
|  |  |  | 27 | TAAQSQDDG | 0.995 |
|  |  |  | 50 | SELTSWSFY | 0.956 |
|  |  |  | 82 | VNRSSSKCA | 0.996 |
|  |  |  | 83 | NRSSSKCAT | 0.994 |
|  |  |  | 131 | ARKLSLTRA | 0.926 |
|  |  |  | 198 | YTVFSATDA | 0.977 |
|  |  |  | 205 | DAKRSARDS | 0.997 |
|  |  |  | 209 | SARDSHVPI | 0.992 |
|  |  |  | 243 | NPARSLGAA | 0.925 |
| PIP1-8 | 289 | 9 | 9 | EQDVSLGAN | 0.868 |
|  |  |  | 27 | TAAQSQDDG | 0.995 |
|  |  |  | 50 | TEFTSWSFY | 0.829 |
|  |  |  | 83 | AGAKSKCST | 0.874 |
|  |  |  | 131 | ARKLSLPRA | 0.739 |
|  |  |  | 198 | YTVFSATDA | 0.977 |
|  |  |  | 205 | DAKRSARDS | 0.997 |
|  |  |  | 209 | SARDSHVPI | 0.992 |
|  |  |  | 243 | NPARSLGAA | 0.925 |
| PIP2-1 | 285 | 9 | 10 | VEGGSFSAK | 0.537 |
|  |  |  | 12 | GGSFSAKDY | 0.994 |
|  |  |  | 62 | IGYKSQSDV | 0.985 |
|  |  |  | 64 | YKSQSDVKA | 0.603 |
|  |  |  | 119 | ARKVSLIRA | 0.915 |
|  |  |  | 185 | YTVFSATDP | 0.973 |
|  |  |  | 196 | NARDSHVPV | 0.983 |
|  |  |  | 230 | NPARSLGAA | 0.965 |
|  |  |  | 278 | KALGSFRSN | 0.653 |
| PIP2-2 | 285 | 8 | 62 | IGYKSQSDV | 0.985 |
|  |  |  | 64 | YKSQSDVKA | 0.603 |
|  |  |  | 119 | ARKVSLIRA | 0.915 |
|  |  |  | 185 | YTVFSATDP | 0.973 |
|  |  |  | 196 | NARDSHVPV | 0.983 |
|  |  |  | 230 | NPARSLGAA | 0.965 |
|  |  |  | 271 | ILRASAAKA | 0.537 |
|  |  |  | 278 | KALGSFRSN | 0.653 |
| PIP2-3 | 285 | 9 | 10 | VEGGSFSAK | 0.537 |
|  |  |  | 12 | GGSFSAKDY | 0.994 |
|  |  |  | 62 | IGYKSQSDV | 0.985 |
|  |  |  | 64 | YKSQSDVKA | 0.603 |
|  |  |  | 119 | ARKVSLIRA | 0.915 |
|  |  |  | 185 | YTVFSATDP | 0.973 |
|  |  |  | 196 | NARDSHVPV | 0.983 |
|  |  |  | 230 | NPARSLGAA | 0.965 |
|  |  |  | 278 | KALGSFRSN | 0.653 |
| PIP2-4 | 285 | 10 | 10 | VEGGSFSAK | 0.537 |
|  |  |  | 12 | GGSFSAKDY | 0.994 |
|  |  |  | 62 | IGYKSQSDV | 0.985 |
|  |  |  | 64 | YKSQSDVKA | 0.603 |
|  |  |  | 119 | ARKVSLIRA | 0.915 |
|  |  |  | 185 | YTVFSATDP | 0.973 |
|  |  |  | 196 | NARDSHVPV | 0.983 |
|  |  |  | 230 | NPARSFGAA | 0.958 |
|  |  |  | 271 | ILRASAAKA | 0.736 |
|  |  |  | 278 | KAVGSFRSN | 0.777 |
| PIP2-5 | 296 | 7 | 21 | AERGSFSGK | 0.916 |
|  |  |  | 23 | RGSFSGKDY | 0.997 |
|  |  |  | 130 | ARKVSLIRA | 0.915 |
|  |  |  | 196 | YTVFSATDP | 0.973 |
|  |  |  | 207 | NARDSHVPV | 0.983 |
|  |  |  | 241 | NPARSLGAA | 0.965 |
|  |  |  | 289 | KALGSFRSN | 0.653 |
| PIP2-6 | 284 | 8 | 12 | AERGSFSGK | 0.916 |
|  |  |  | 14 | RGSFSGKDY | 0.997 |
|  |  |  | 118 | ARKVSLIRA | 0.915 |
|  |  |  | 157 | GGANSLADG | 0.919 |
|  |  |  | 184 | YTVFSATDP | 0.973 |
|  |  |  | 195 | NARDSHVPV | 0.983 |
|  |  |  | 229 | NPARSLGAA | 0.965 |
|  |  |  | 277 | KALGSFRSN | 0.653 |
| PIP2-7 | 286 | 8 | 15 | GGEYSAKDY | 0.961 |
|  |  |  | 122 | GRKVSLIRA | 0.873 |
|  |  |  | 150 | GFQKSYYNR | 0.684 |
|  |  |  | 161 | GGANSVADG | 0.972 |
|  |  |  | 188 | YTVFSATDP | 0.973 |
|  |  |  | 199 | NARDSHVPV | 0.983 |
|  |  |  | 233 | NPARSFGAA | 0.958 |
|  |  |  | 281 | KALGSFRSN | 0.723 |
| PIP2-8 | 286 | 7 | 15 | GGEYSAKDY | 0.961 |
|  |  |  | 122 | GRKVSLIRA | 0.873 |
|  |  |  | 161 | GGANSVADG | 0.972 |
|  |  |  | 188 | YTVFSATDP | 0.973 |
|  |  |  | 199 | NARDSHVPV | 0.983 |
|  |  |  | 233 | NPARSFGAA | 0.958 |
|  |  |  | 281 | KALGSFRSN | 0.723 |
| PIP2-9 | 287 | 9 | 15 | QGEYSAKDY | 0.996 |
|  |  |  | 67 | YKRQSDTKI | 0.992 |
|  |  |  | 123 | GRKVSLVRA | 0.758 |
|  |  |  | 151 | GFQKSYYNR | 0.684 |
|  |  |  | 189 | YTVFSATDP | 0.973 |
|  |  |  | 196 | DPKRSARDS | 0.998 |
|  |  |  | 200 | SARDSHVPV | 0.982 |
|  |  |  | 234 | NPARSFGPA | 0.946 |
|  |  |  | 282 | KALGSFRSN | 0.724 |
| PIP2-10 | 287 | 8 | 15 | QGEYSAKDY | 0.996 |
|  |  |  | 67 | YKRQSDTKI | 0.992 |
|  |  |  | 123 | GRKVSLVRA | 0.758 |
|  |  |  | 189 | YTVFSATDP | 0.973 |
|  |  |  | 200 | NARDSHVPV | 0.983 |
|  |  |  | 234 | NPARSFGPA | 0.946 |
|  |  |  | 275 | ILRGSAIKA | 0.66 |
|  |  |  | 282 | KALGSFRSN | 0.723 |
| PIP2-11 | 286 | 7 | 36 | LRKWSFYRA | 0.932 |
|  |  |  | 120 | ARKVSLIRA | 0.956 |
|  |  |  | 148 | ALQKSYYNR | 0.788 |
|  |  |  | 186 | YTVFSATDP | 0.973 |
|  |  |  | 197 | VARDSHVPV | 0.965 |
|  |  |  | 231 | NPARSLGPA | 0.955 |
|  |  |  | 279 | KALGSFRSS | 0.597 |
| PIP2-12 | 285 | 7 | 36 | LRKWSFFRA | 0.572 |
|  |  |  | 119 | ARKVSLTRA | 0.963 |
|  |  |  | 147 | ALQKSYYNR | 0.788 |
|  |  |  | 185 | YTVFSATDP | 0.973 |
|  |  |  | 196 | VARDSHVPV | 0.965 |
|  |  |  | 230 | NPARSLGPA | 0.955 |
|  |  |  | 278 | KALGSFRSS | 0.597 |
| PIP2-13 | 275 | 9 | 6 | SKEVSQQRK | 0.96 |
|  |  |  | 109 | ARKVSLIRA | 0.913 |
|  |  |  | 141 | HSYNSLGGG | 0.881 |
|  |  |  | 148 | GGANSVSAG | 0.663 |
|  |  |  | 175 | YTVFSATDP | 0.973 |
|  |  |  | 182 | DPKRSARDS | 0.998 |
|  |  |  | 186 | SARDSHIPV | 0.989 |
|  |  |  | 220 | NPARSFGAA | 0.958 |
|  |  |  | 268 | KALGSFRSN | 0.869 |
| PIP2-14 | 278 | 9 | 6 | SKEVSQEGL | 0.986 |
|  |  |  | 112 | ARKVSLIRA | 0.956 |
|  |  |  | 144 | HSYNSLGGG | 0.881 |
|  |  |  | 151 | GGANSVSAG | 0.663 |
|  |  |  | 178 | YTVFSATDP | 0.973 |
|  |  |  | 185 | DPKRSARDS | 0.998 |
|  |  |  | 189 | SARDSHVPV | 0.982 |
|  |  |  | 223 | NPARSLGAA | 0.965 |
|  |  |  | 271 | KALGSFRSN | 0.869 |
| TIP1-1 | 250 | 8 | 15 | AQEASHRDT | 0.995 |
|  |  |  | 165 | VDPRSRRGS | 0.995 |
|  |  |  | 169 | SRRGSLGVM | 0.995 |
|  |  |  | 202 | NPAASFGPA | 0.843 |
|  |  |  | 211 | VVGWSWKNH | 0.926 |
|  |  |  | 239 | LIFVSHSRQ | 0.563 |
|  |  |  | 241 | FVSHSRQRF | 0.904 |
|  |  |  | 248 | RFRRSYY-- | 0.921 |
| TIP1-4 | 245 | 5 | 62 | VVAASLSHA | 0.687 |
|  |  |  | 129 | TVGLSPGVG | 0.915 |
|  |  |  | 190 | FSGASMNPA | 0.6 |
|  |  |  | 196 | NPAVSFGPA | 0.865 |
|  |  |  | 236 | ITPNSYEQL | 0.971 |
| TIP1-5 | 252 | 5 | 62 | VVAASLSHA | 0.687 |
|  |  |  | 134 | TSAFSLSPG | 0.945 |
|  |  |  | 136 | AFSLSPGVG | 0.886 |
|  |  |  | 203 | NPAVSFGPA | 0.865 |
|  |  |  | 243 | ITPNSYEHL | 0.963 |
| TIP1-6 | 252 | 2 | 136 | AFALSPGVE | 0.872 |
|  |  |  | 203 | NPAVSFGPA | 0.865 |
| TIP1-7 | 252 | 3 | 10 | IAIGSPREA | 0.995 |
|  |  |  | 134 | TSAFSLSSG | 0.966 |
|  |  |  | 248 | HEPLSNSDF | 0.987 |
| TIP1-8 | 252 | 4 | 134 | TSGFSLSPG | 0.846 |
|  |  |  | 136 | GFSLSPGVS | 0.905 |
|  |  |  | 203 | NPAVSFGPA | 0.865 |
|  |  |  | 248 | HEPLSSSDF | 0.993 |
| TIP1-9 | 252 | 3 | 136 | GFSLSPGVS | 0.965 |
|  |  |  | 203 | NPAVSFGPA | 0.865 |
|  |  |  | 248 | HEPLSSSDF | 0.993 |
| TIP2-1 | 247 | 3 | 12 | SFNDSVSFA | 0.868 |
|  |  |  | 17 | VSFASIKAY | 0.89 |
|  |  |  | 200 | NPARSFGPA | 0.916 |
| TIP2-2 | 247 | 2 | 17 | FSLASIKAY | 0.803 |
|  |  |  | 200 | NPARSFGPA | 0.916 |
| TIP2-3 | 237 | 3 | 12 | NFNDSVSFA | 0.88 |
|  |  |  | 17 | VSFASIKAY | 0.89 |
|  |  |  | 200 | NPARSFGPA | 0.916 |
| TIP2-4 | 248 | 6 | 12 | RFDDSFSLT | 0.581 |
|  |  |  | 14 | DDSFSLTSI | 0.743 |
|  |  |  | 17 | FSLTSIKAY | 0.903 |
|  |  |  | 135 | HSVASGVGA | 0.873 |
|  |  |  | 201 | NPARSFGPA | 0.916 |
|  |  |  | 245 | HAPLSSEF- | 0.88 |
| TIP2-5 | 248 | 5 | 12 | RLDDSFSLT | 0.599 |
|  |  |  | 17 | FSLTSIKAY | 0.903 |
|  |  |  | 135 | HSVASGVGA | 0.873 |
|  |  |  | 201 | NPARSFGPA | 0.916 |
|  |  |  | 245 | HAPLSSEF- | 0.88 |
| TIP2-6 | 249 | 2 | 126 | ITAKSIPSH | 0.51 |
|  |  |  | 200 | NPARSFGPA | 0.916 |
| TIP2-7 | 249 | 4 | 12 | TLDDSFSAA | 0.806 |
|  |  |  | 17 | FSAASLKAY | 0.972 |
|  |  |  | 131 | IPSHSPANG | 0.99 |
|  |  |  | 200 | NPARSFGPA | 0.916 |
| TIP3-1 | 254 | 5 | 15 | MNEASHPDS | 0.974 |
|  |  |  | 19 | SHPDSIRAA | 0.987 |
|  |  |  | 54 | EPGSSAGEL | 0.987 |
|  |  |  | 99 | GGRISVLRA | 0.559 |
|  |  |  | 170 | PKRGSIGSI | 0.978 |
| TIP3-2 | 254 | 5 | 15 | MNEASHPDS | 0.974 |
|  |  |  | 19 | SHPDSIRAA | 0.987 |
|  |  |  | 54 | EPGSSAGEL | 0.987 |
|  |  |  | 99 | GGRISVLRA | 0.748 |
|  |  |  | 170 | PKRGSIGSI | 0.978 |
| TIP3-3 | 255 | 5 | 7 | TRRYSFGRA | 0.997 |
|  |  |  | 19 | THPDSMRAT | 0.993 |
|  |  |  | 54 | DSAFSAGEL | 0.968 |
|  |  |  | 99 | GGRISVLRA | 0.977 |
|  |  |  | 170 | PKRGSVSNI | 0.992 |
| TIP3-4 | 255 | 4 | 19 | THPDSMRAT | 0.993 |
|  |  |  | 54 | DSAFSAGEL | 0.968 |
|  |  |  | 99 | GGRISVLRA | 0.977 |
|  |  |  | 172 | RGAVSNIAP | 0.507 |
| TIP4-1 | 246 | 3 | 8 | IALGSTREA | 0.99 |
|  |  |  | 191 | YSAASMNPA | 0.89 |
|  |  |  | 197 | NPARSFGPA | 0.834 |
| TIP4-2 | 246 | 3 | 8 | IALGSTREA | 0.983 |
|  |  |  | 191 | YSAASMNPA | 0.89 |
|  |  |  | 197 | NPARSFGPA | 0.834 |
| TIP5-1 | 247 | 11 | 15 | RFHESVTRN | 0.804 |
|  |  |  | 23 | NALRSYLSE | 0.686 |
|  |  |  | 146 | GFGASVLEG | 0.873 |
|  |  |  | 172 | RGPMSSTGI | 0.943 |
|  |  |  | 212 | AIAGSFRNQ | 0.55 |
| NIP1-1 | 148 |  | 21 | MILPSESDL | 0.954 |
|  |  |  | 57 | TKYLSSTSH | 0.624 |
|  |  |  | 58 | KYLSSTSHL | 0.539 |
|  |  |  | 60 | LSSTSHLEA | 0.949 |
|  |  |  | 89 | DHRGSKDLT | 0.987 |
|  |  |  | 121 | NPARSLGPA | 0.862 |
| NIP1-2 | 277 | 10 | 12 | NFDSSIKSE | 0.98 |
|  |  |  | 15 | SSIKSEFST | 0.968 |
|  |  |  | 18 | KSEFSTEQA | 0.993 |
|  |  |  | 32 | EAKHSPSNI | 0.933 |
|  |  |  | 141 | TKYLSSTSD | 0.514 |
|  |  |  | 142 | KYLSSTSDL | 0.993 |
|  |  |  | 144 | LSSTSDLEA | 0.926 |
|  |  |  | 173 | DHRGSKDLT | 0.987 |
|  |  |  | 205 | NPARSLGPA | 0.862 |
|  |  |  | 244 | EGRPSGGGI | 0.778 |
| NIP1-3 | 268 | 4 | 147 | IPSGSYIQS | 0.852 |
|  |  |  | 202 | ISGASMNPA | 0.58 |
|  |  |  | 208 | NPARSLGPA | 0.862 |
|  |  |  | 255 | EIGASSKIF | 0.882 |
| NIP1-4 | 238 | 3 | 117 | TPARSHIES | 0.995 |
|  |  |  | 178 | VSRVSMNPT | 0.988 |
|  |  |  | 184 | NPTRSLGPT | 0.786 |
| NIP1-5 | 215 | 8 | 51 | LRRISGAHF | 0.867 |
|  |  |  | 70 | FRRFSYKEV | 0.998 |
|  |  |  | 134 | ISAVSTDDR | 0.981 |
|  |  |  | 166 | VSGASMNPA | 0.702 |
|  |  |  | 172 | NPARSIGPA | 0.914 |
|  |  |  | 212 | SIDKSSSE- | 0.991 |
|  |  |  | 213 | IDKSSSE-- | 0.952 |
|  |  |  | 214 | DKSSSE--- | 0.898 |
| NIP1-6 | 311 | 12 | 14 | EEMPSMEEG | 0.995 |
|  |  |  | 20 | EEGVSSPSP | 0.526 |
|  |  |  | 21 | EGVSSPSPS | 0.989 |
|  |  |  | 23 | VSSPSPSRT | 0.997 |
|  |  |  | 25 | SPSPSRTCN | 0.966 |
|  |  |  | 47 | AQKVSDHDH | 0.943 |
|  |  |  | 134 | FRRFSYKQV | 0.997 |
|  |  |  | 198 | ISAVSTDDK | 0.985 |
|  |  |  | 262 | VSGASMNPA | 0.702 |
|  |  |  | 268 | NPARSIGPA | 0.914 |
|  |  |  | 304 | NFLRSPYKP | 0.958 |
|  |  |  | 310 | YKPPSE--- | 0.724 |
| NIP1-7 | 243 | 5 | 82 | IAFASTRRF | 0.94 |
|  |  |  | 185 | NPVRSLGPA | 0.541 |
|  |  |  | 232 | EITKSASFL | 0.808 |
|  |  |  | 234 | TKSASFLKG | 0.86 |
|  |  |  | 242 | GRGGST--- | 0.569 |
| NIP1-8 | 271 | 9 | 10 | AGTESQEVV | 0.555 |
|  |  |  | 22 | TKNTSETIQ | 0.72 |
|  |  |  | 30 | QRSDSLVSV | 0.986 |
|  |  |  | 106 | IAFASTRRF | 0.94 |
|  |  |  | 213 | NPARSLGPA | 0.929 |
|  |  |  | 255 | DKPLSEITK | 0.962 |
|  |  |  | 260 | EITKSASFL | 0.621 |
|  |  |  | 262 | TKSASFLKG | 0.86 |
|  |  |  | 270 | GRAASK--- | 0.884 |
| NIP1-9 | 270 | 8 | 22 | NRDVSRTTQ | 0.971 |
|  |  |  | 30 | QASRSCVNV | 0.55 |
|  |  |  | 106 | IAFASTKRF | 0.981 |
|  |  |  | 138 | RLLFSGKEA | 0.967 |
|  |  |  | 213 | NPARSIGPA | 0.914 |
|  |  |  | 246 | WVYNSIRYT | 0.62 |
|  |  |  | 260 | EITKSASFL | 0.808 |
|  |  |  | 262 | TKSASFLKG | 0.715 |
| NIP1-10 | 274 | 9 | 22 | NKDVSRTTQ | 0.898 |
|  |  |  | 30 | QPSRSCVNV | 0.66 |
|  |  |  | 74 | HPGISIVWG | 0.522 |
|  |  |  | 106 | IAFASTRRF | 0.94 |
|  |  |  | 138 | RLLFSGKET | 0.986 |
|  |  |  | 213 | NPARSIGPA | 0.914 |
|  |  |  | 260 | EITKSTSFL | 0.925 |
|  |  |  | 262 | TKSTSFLKG | 0.861 |
|  |  |  | 272 | GRSGSSR-- | 0.658 |
| NIP1-11 | 273 | 6 | 31 | KCDDSANQD | 0.588 |
|  |  |  | 77 | QPGISIVWG | 0.793 |
|  |  |  | 153 | GTLPSGSDL | 0.846 |
|  |  |  | 216 | NPARSLGPA | 0.862 |
|  |  |  | 263 | EITKSASFL | 0.808 |
|  |  |  | 265 | TKSASFLKG | 0.628 |
| NIP1-12 | 267 | 6 | 19 | NGDASKKCD | 0.992 |
|  |  |  | 25 | KCDDSSNQD | 0.691 |
|  |  |  | 26 | CDDSSNQDC | 0.792 |
|  |  |  | 71 | QPGISIVWG | 0.793 |
|  |  |  | 210 | NPARSLGPA | 0.862 |
|  |  |  | 257 | EITKSASFL | 0.808 |
| NIP2-1 | 293 | 20 | 15 | AFIPSTIET | 0.923 |
|  |  |  | 21 | IETPSPSIP | 0.975 |
|  |  |  | 23 | TPSPSIPEI | 0.913 |
|  |  |  | 28 | IPEISSSSS | 0.759 |
|  |  |  | 30 | EISSSSSPG | 0.745 |
|  |  |  | 31 | ISSSSSPGS | 0.644 |
|  |  |  | 32 | SSSSSPGSL | 0.995 |
|  |  |  | 35 | SSPGSLARI | 0.858 |
|  |  |  | 72 | SAGLSKIDE | 0.996 |
|  |  |  | 80 | ERMVSKLGA | 0.901 |
|  |  |  | 112 | NPAVSLAFT | 0.595 |
|  |  |  | 151 | LLRPSNEIG | 0.889 |
|  |  |  | 158 | IGGTSPAGS | 0.77 |
|  |  |  | 162 | SPAGSHIQA | 0.952 |
|  |  |  | 231 | AIATSYYKG | 0.697 |
|  |  |  | 270 | PISLSSISS | 0.504 |
|  |  |  | 271 | ISLSSISSK | 0.501 |
|  |  |  | 273 | LSSISSKVR | 0.679 |
|  |  |  | 274 | SSISSKVRQ | 0.675 |
|  |  |  | 279 | KVRQSIGGT | 0.996 |
| NIP2-2 | 295 | 19 | 15 | TFIPSTIET | 0.974 |
|  |  |  | 21 | IETPSPSIP | 0.975 |
|  |  |  | 23 | TPSPSIPEI | 0.913 |
|  |  |  | 29 | PEISSSSPS | 0.66 |
|  |  |  | 31 | ISSSSPSPG | 0.988 |
|  |  |  | 33 | SSSPSPGGS | 0.995 |
|  |  |  | 44 | RVAQSYPPG | 0.512 |
|  |  |  | 74 | SAGLSKIDE | 0.993 |
|  |  |  | 79 | KIDESMVSK | 0.593 |
|  |  |  | 114 | NPAVSLAFT | 0.595 |
|  |  |  | 153 | LLRPSDEIG | 0.975 |
|  |  |  | 160 | IGGTSPAGS | 0.77 |
|  |  |  | 164 | SPAGSHIQA | 0.952 |
|  |  |  | 233 | AIATSYYKG | 0.697 |
|  |  |  | 272 | PISLSSISS | 0.504 |
|  |  |  | 273 | ISLSSISSK | 0.501 |
|  |  |  | 275 | LSSISSKVR | 0.679 |
|  |  |  | 276 | SSISSKVRQ | 0.675 |
|  |  |  | 281 | KVRQSIGGT | 0.996 |
| NIP3-1 | 304 | 7 | 33 | RNNNSKKSL | 0.888 |
|  |  |  | 36 | NSKKSLLKS | 0.671 |
|  |  |  | 40 | SLLKSCRCF | 0.772 |
|  |  |  | 45 | CRCFSVEEW | 0.996 |
|  |  |  | 50 | VEEWSLEDG | 0.995 |
|  |  |  | 298 | KAKTSISSF | 0.942 |
|  |  |  | 301 | TSISSFRR- | 0.905 |
| NIP3-2 | 306 | 8 | 11 | PSLPSTSAT | 0.781 |
|  |  |  | 13 | LPSTSATPG | 0.604 |
|  |  |  | 40 | VVRKSSFLK | 0.83 |
|  |  |  | 41 | VRKSSFLKS | 0.744 |
|  |  |  | 45 | SFLKSCKCF | 0.921 |
|  |  |  | 65 | MPRVSCSLP | 0.675 |
|  |  |  | 165 | QVLASVSAA | 0.969 |
|  |  |  | 298 | KTPSSAPNG | 0.978 |
| NIP3-3 | 248 | 5 | 16 | LNVASTKEW | 0.95 |
|  |  |  | 39 | LSSLSSKMI | 0.989 |
|  |  |  | 72 | KNDWSCYDD | 0.945 |
|  |  |  | 119 | QVLASVSAA | 0.799 |
|  |  |  | 154 | VAEFSVSFT | 0.605 |
| NIP3-4 | 449 | 6 | 45 | QVLASVSAA | 0.799 |
|  |  |  | 61 | HPYMSGGVT | 0.766 |
|  |  |  | 227 | EKEKSQGSV | 0.944 |
|  |  |  | 287 | QVLASVSAA | 0.799 |
|  |  |  | 342 | TRVVSARVP | 0.972 |
|  |  |  | 363 | NRGGSHCHD | 0.93 |
| NIP3-5 | 290 | 6 | 13 | PTAASVPAT | 0.943 |
|  |  |  | 33 | LRVDSLSHE | 0.983 |
|  |  |  | 35 | VDSLSHERE | 0.997 |
|  |  |  | 40 | HERESFSMA | 0.991 |
|  |  |  | 229 | SGPTSGGSM | 0.823 |
|  |  |  | 287 | RQVRSFRR- | 0.625 |
| NIP3-6 | 263 | 6 | 13 | PTAASVPAT | 0.943 |
|  |  |  | 33 | LRVDSLSHE | 0.983 |
|  |  |  | 35 | VDSLSHERD | 0.997 |
|  |  |  | 40 | HERDSFAMA | 0.991 |
|  |  |  | 202 | SGPTSGGSM | 0.823 |
|  |  |  | 260 | RQVRSFRR- | 0.625 |
| NIP4-1 | 340 | 13 | 11 | KHQSSDSSN | 0.95 |
|  |  |  | 14 | SSDSSNYAS | 0.837 |
|  |  |  | 18 | SNYASSSGL | 0.665 |
|  |  |  | 36 | RAATSKHRY | 0.915 |
|  |  |  | 149 | QTVGSMSAT | 0.799 |
|  |  |  | 202 | SESQSVGHL | 0.948 |
|  |  |  | 226 | TGPVSGGSM | 0.53 |
|  |  |  | 229 | VSGGSMNPA | 0.539 |
|  |  |  | 235 | NPARSLGPA | 0.862 |
|  |  |  | 281 | STLSSPNII | 0.632 |
|  |  |  | 298 | CSRRSGPMI | 0.944 |
|  |  |  | 312 | NWSLSYGRV | 0.561 |
|  |  |  | 331 | TKGISDGVY | 0.619 |
| NIP4-2 | 282 | 10 | 91 | QTVGSMSAT | 0.799 |
|  |  |  | 140 | AALTSESQS | 0.766 |
|  |  |  | 144 | SESQSVGHL | 0.948 |
|  |  |  | 168 | TGPVSGGSM | 0.53 |
|  |  |  | 171 | VSGGSMNPA | 0.539 |
|  |  |  | 177 | NPARSLGPA | 0.862 |
|  |  |  | 223 | SILSSPNIS | 0.712 |
|  |  |  | 240 | CSRRSGPMI | 0.944 |
|  |  |  | 253 | KNWSSFSER | 0.764 |
|  |  |  | 273 | TKGISEGVY | 0.744 |
| SIP1-3 | 248 | 2 | 132 | IGGPSLKVD | 0.804 |
|  |  |  | 239 | FPPPSPPEV | 0.886 |
| SIP1-4 | 248 | 1 | 132 | IGGPSLKVD | 0.804 |
| SIP1-5 | 239 | 4 | 76 | NPSTSLSFY | 0.644 |
|  |  |  | 88 | LRPDSSLSS | 0.945 |
|  |  |  | 91 | DSSLSSMAV | 0.561 |
|  |  |  | 134 | VDLHSGAVA | 0.64 |
| SIP1-6 | 239 | 4 | 76 | NPSTSLSFY | 0.644 |
|  |  |  | 88 | LRPDSSLSS | 0.945 |
|  |  |  | 91 | DSSLSSMAV | 0.561 |
|  |  |  | 134 | VDLHSGAVA | 0.64 |
| SIP2-1 | 230 | 1 | 127 | IHQGSLTEG | 0.942 |
| SIP2-2 | 236 | 4 | 229 | KEDKSTSKS | 0.994 |
|  |  |  | 231 | DKSTSKSKS | 0.993 |
|  |  |  | 233 | STSKSKSD- | 0.997 |
|  |  |  | 235 | SKSKSD--- | 0.976 |
| XIP1-1 | 312 | 6 | 6 | DDQFSTVHS | 0.619 |
|  |  |  | 10 | STVHSHSRE | 0.991 |
|  |  |  | 12 | VHSHSREPM | 0.996 |
|  |  |  | 25 | VHEKSSEPK | 0.761 |
|  |  |  | 143 | FVLKSVMEP | 0.947 |
|  |  |  | 167 | KGQSSGLRP | 0.746 |
| XIP2-1 | 270 | 4 | 29 | ACLDSHEID | 0.763 |
|  |  |  | 62 | GGHMSPVFT | 0.923 |
|  |  |  | 160 | DKKRSRDLG | 0.666 |
|  |  |  | 256 | NTSVSKDHQ | 0.555 |
